# Supplementary material for: A Novel Ferroptosis-Related Long Non-Coding RNA Prognostic Signature Correlates With Genomic Heterogeneity, Immunosuppressive Phenotype, and Drug Sensitivity in Hepatocellular Carcinoma
Source: PubMed Central journal article supplement (PMC9304774; doi:10.3389/fimmu.2022.929089), 2022-07-08
Supplement: DataSheet_1.pdf [file DataSheet_1.pdf]

## *Supplementary Material*

### **1 SUPPLEMENTARY DATA**

Download link sharing scope set to "anyone" is not available

Please obtain the original data and code through the following account number

Account: drlgh1124@sina.com Password: z5227218

[https://www.jianguoyun.com/p/DdYUffUQ\\_e7BChiro7oEIAA](https://www.jianguoyun.com/p/DdYUffUQ_e7BChiro7oEIAA)

### **2 SUPPLEMENTARY FIGURES AND TABLES**

#### **2.1 SUPPLEMENTARY FIGURES**

Figure S1

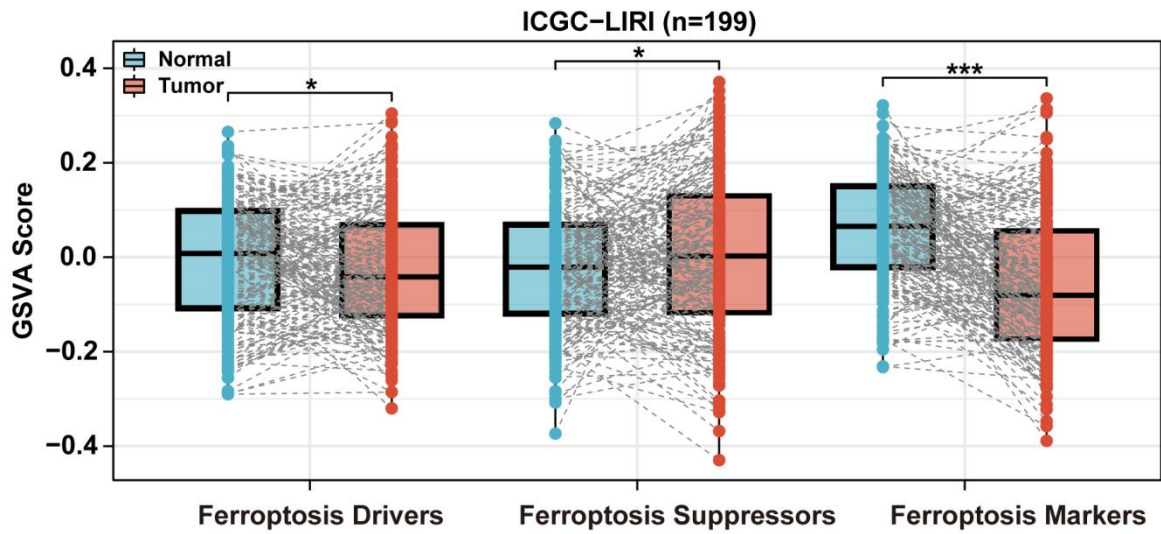

**Supplementary Figure 1.** GSVAscore of ferroptosis drive, ferroptosis suppressor and ferroptosis maker in paired samples of ICGC-LIRI cohort.

Figure S2

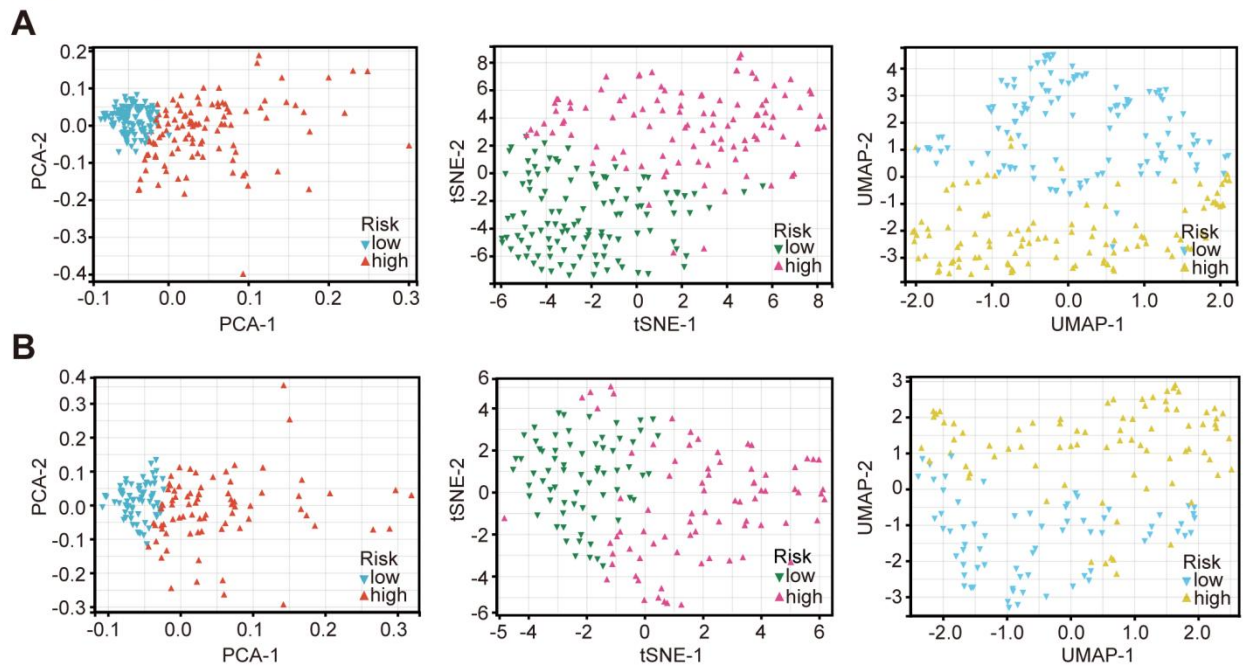

**Supplementary Figure 2. (A)** PCA, t-SNE and UMAP analysis of patients in training cohort based on the expression profiles of the 5 signature lncRNAs. **(B)** PCA, t-SNE and UMAP analysis of patients in testing cohort based on the expression profiles of the 5 signature lncRNAs.

**Figure S3**

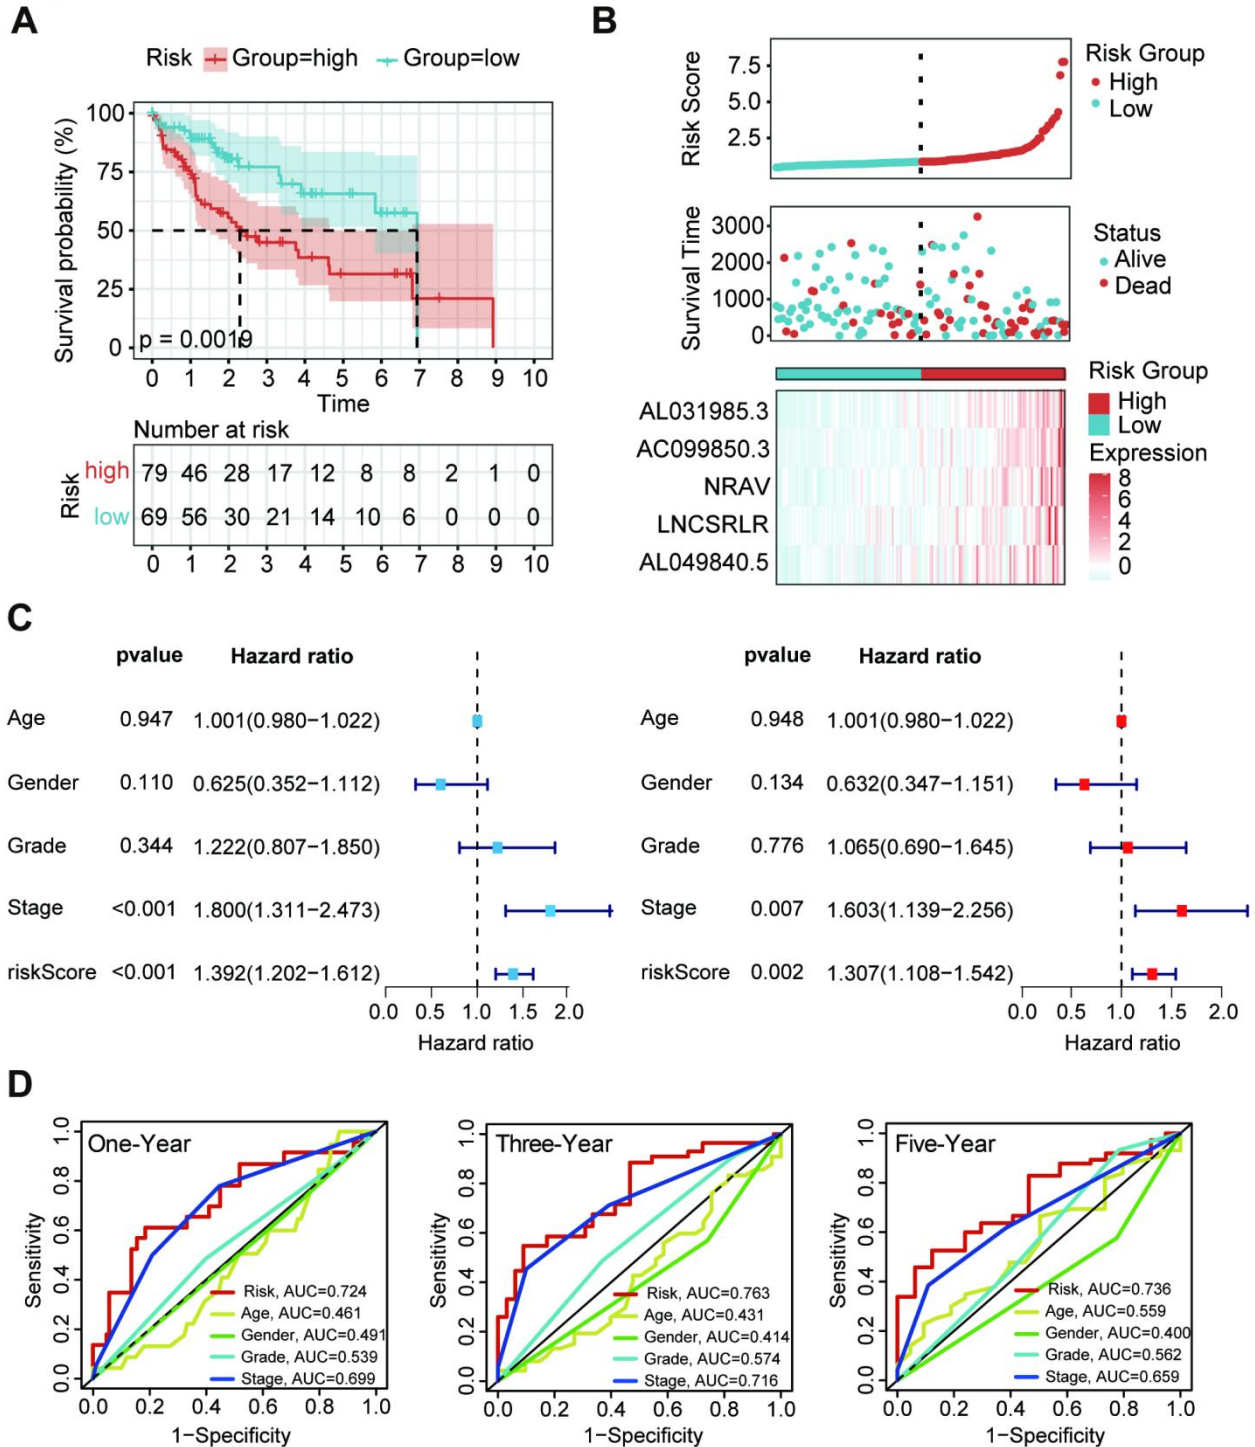

**Supplementary Figure 3. (A)** Kaplan-Meier curves for the OS of patients in different groups

( $p=0.0019$ ). **(B)** Risk curve of the risk score rank, scatter plot for the survival status distribution, and expression profiles of 5 ferroptosis-associated lncRNAs. **(C)** Univariate and multivariate Cox analyses for the independent prognostic predictor in the testing cohort. **(E)** Multivariate ROC curves to predict the sensitivity and specificity of 1, 3, and 5 years survival in the testing cohort.

**Figure S4**

**A**

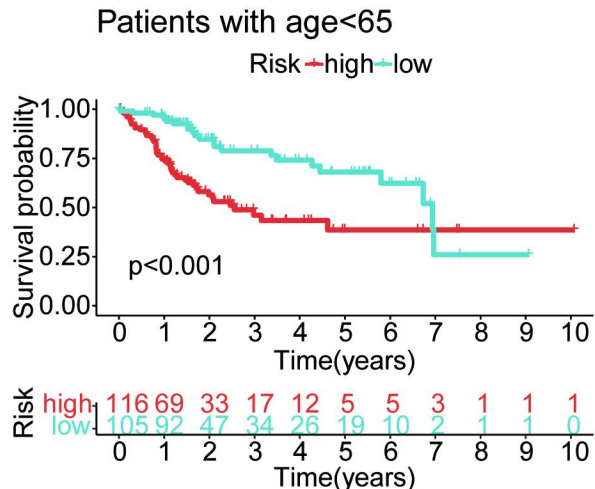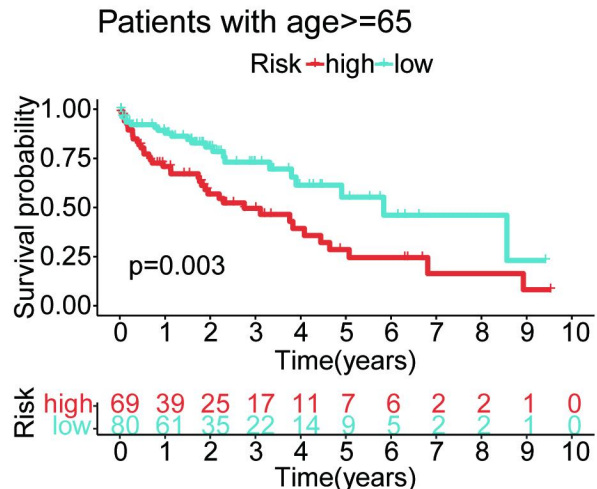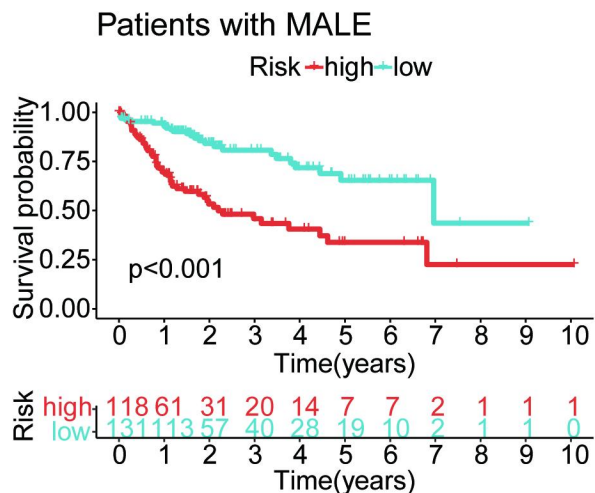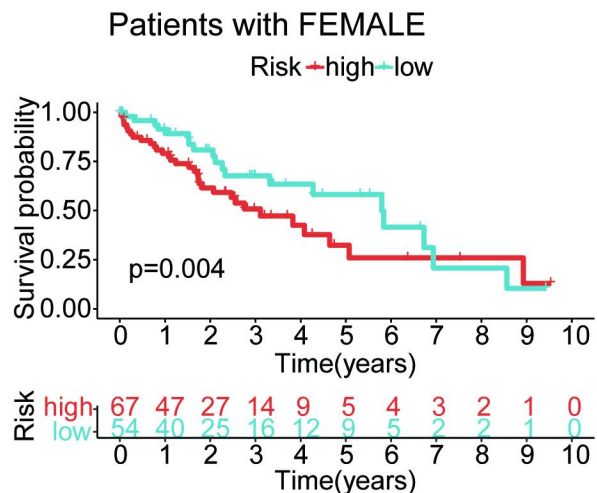

**B**

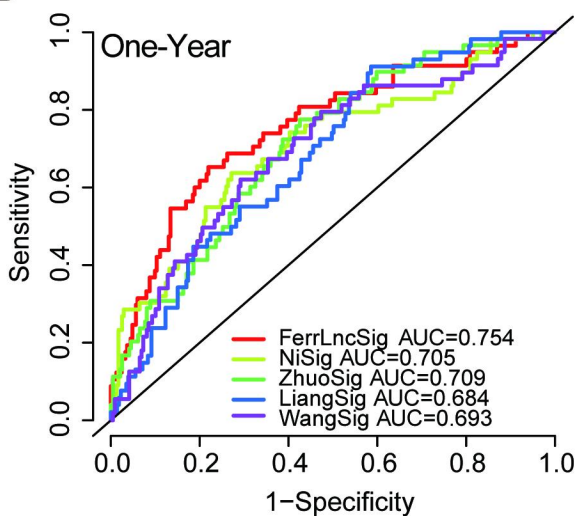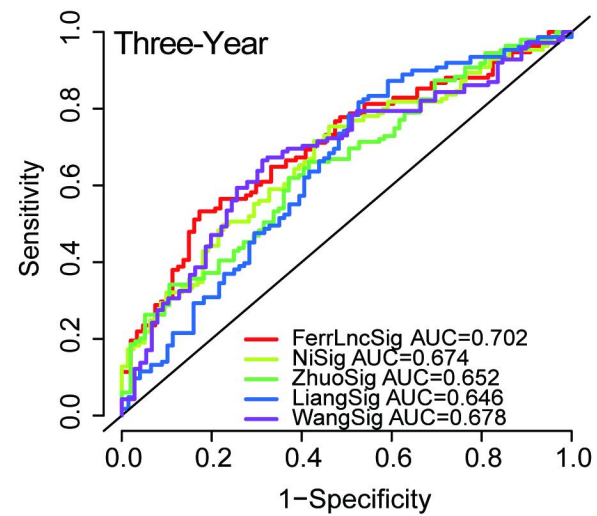



**Supplementary Figure 4. (A)** Kaplan-Meier analyses of the signature stratified by age and gender. **(B)** Multivariate ROC curves of different HCC signatures to predict the sensitivity and specificity of 1 and 3 years survival.

### Figure S5

**A**

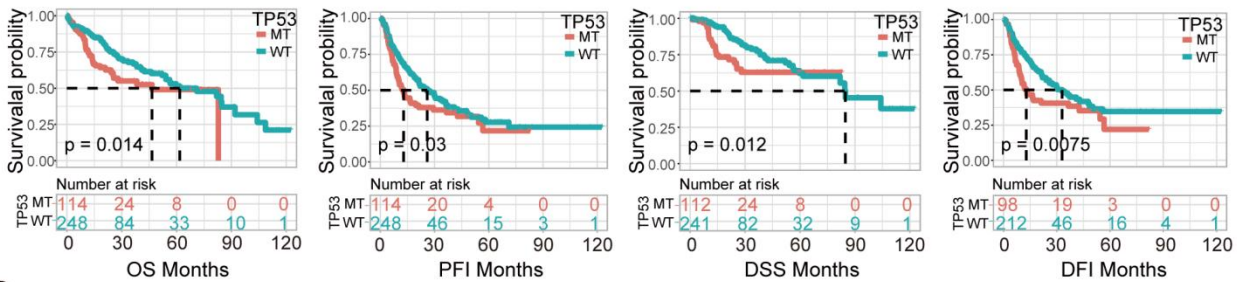

**B**

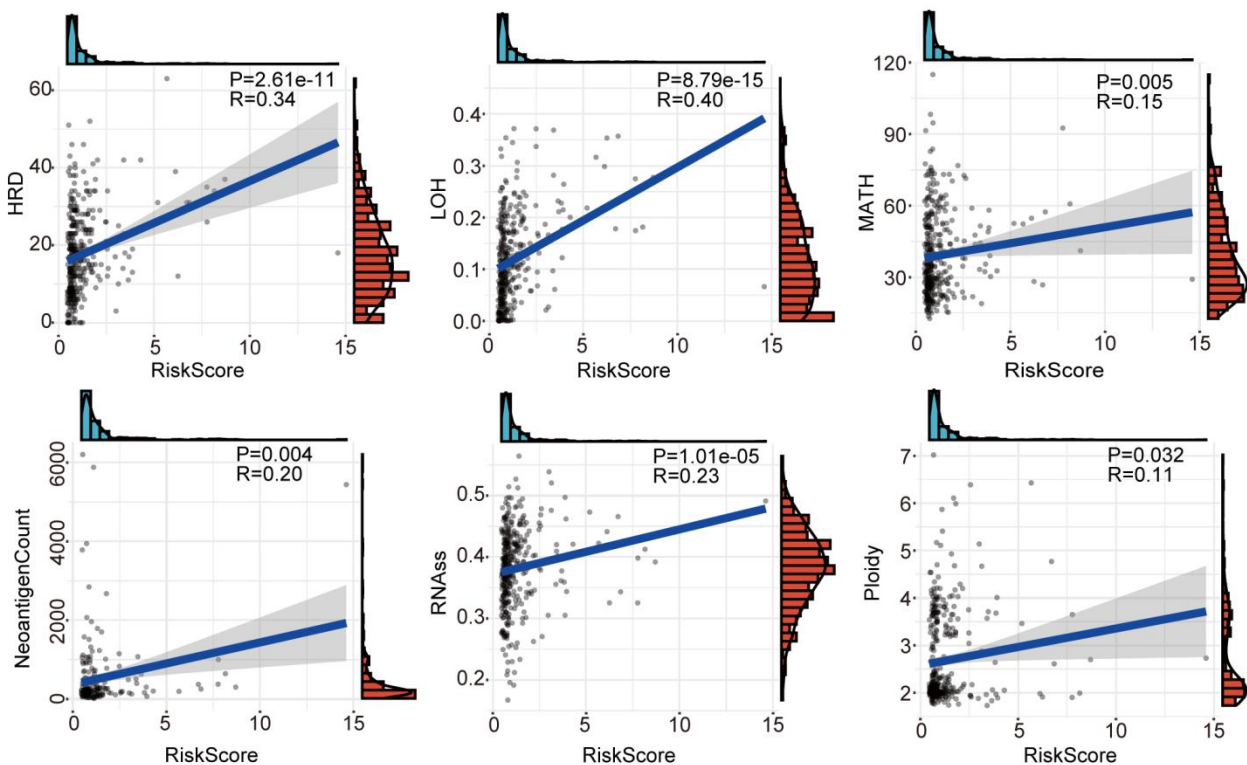

**Supplementary Figure 5. (A)** OS, PFI, DSS, and DFI of patients stratified by TP53 mutation status in TCGA-LIHC cohort. WT, wild-type TP53; Mut, TP53 mutation. OS, overall survival; DSS, disease-specific survival; PFI, progression-free interval; DFI, disease-free interval. **(B)** Correlations between risk score and HRD, LOH, MATH, ploidy, neoantigen count and RNAss.

Figure S6

A

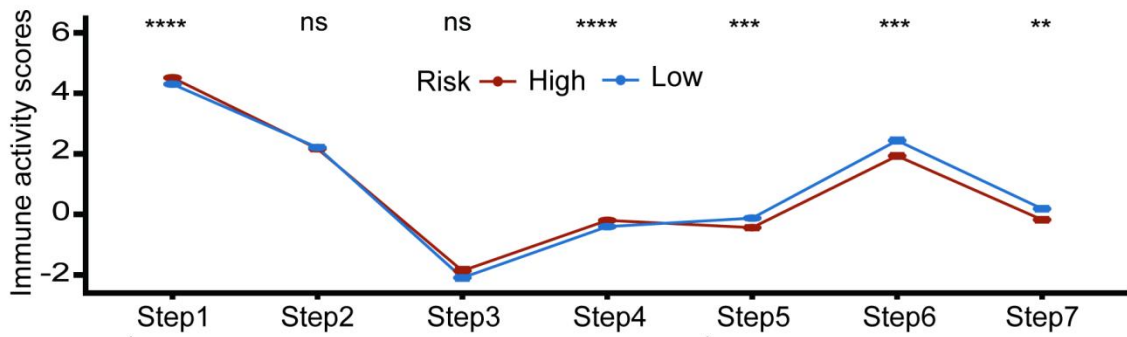

B

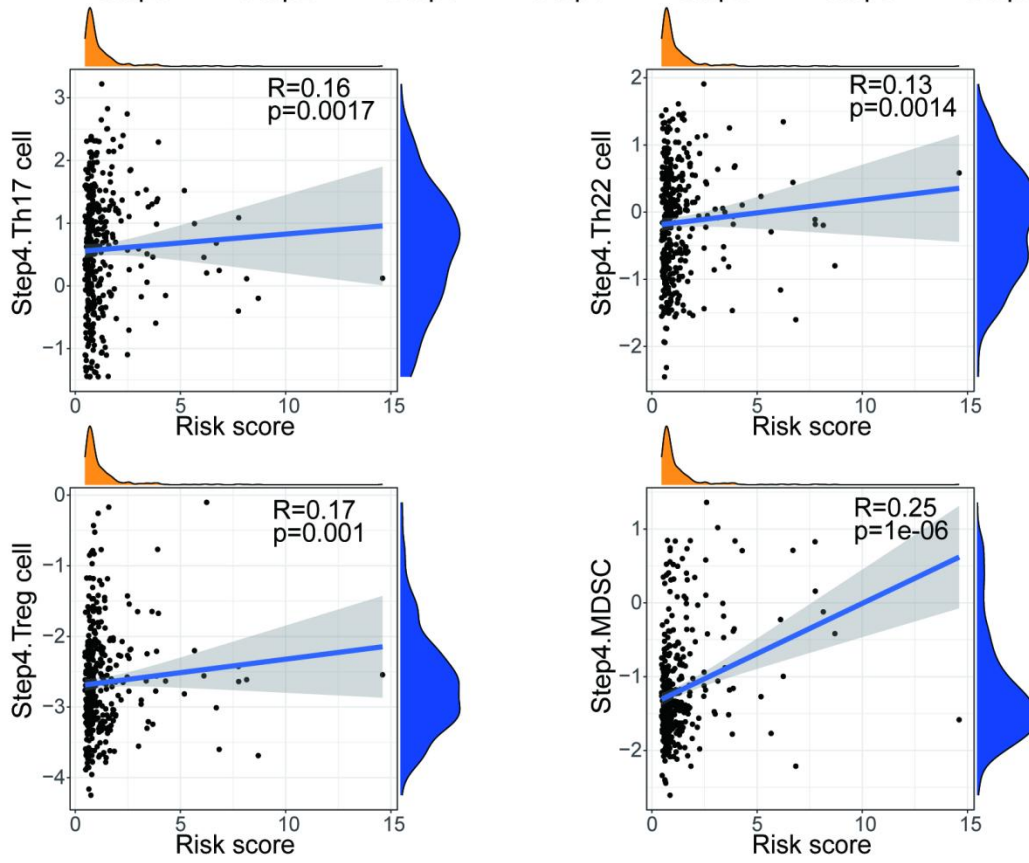

C

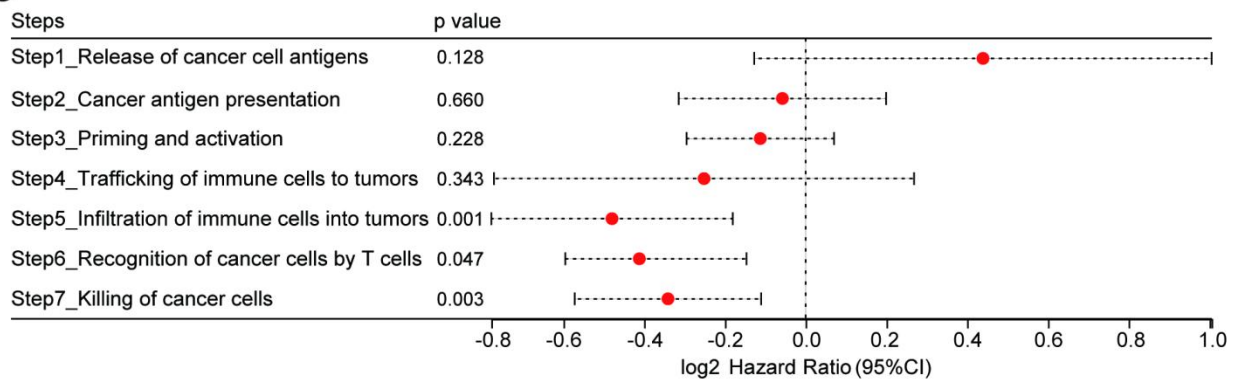

**Supplementary Figure 6.** (A) Line chart showing the differences of seven-step cancer-immunity cycle between the different risk groups. (B) Correlations between risk score and the cell recruitments of Th17, Th22, Treg and MDSC. (C) Survival analysis of seven-step cancer-immunity cycle.

## Figure S7

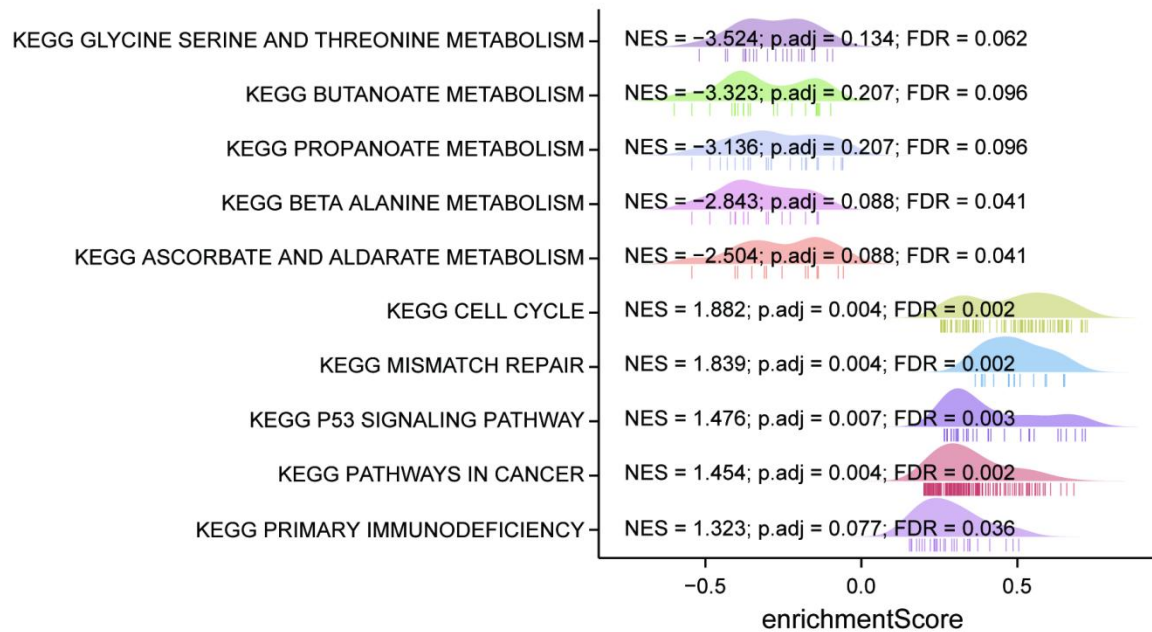

**Supplementary Figure 7.** Gene set enrichment analysis of ferroptosis-associated lncRNA signature based on KEGG database.



**Figure S8**

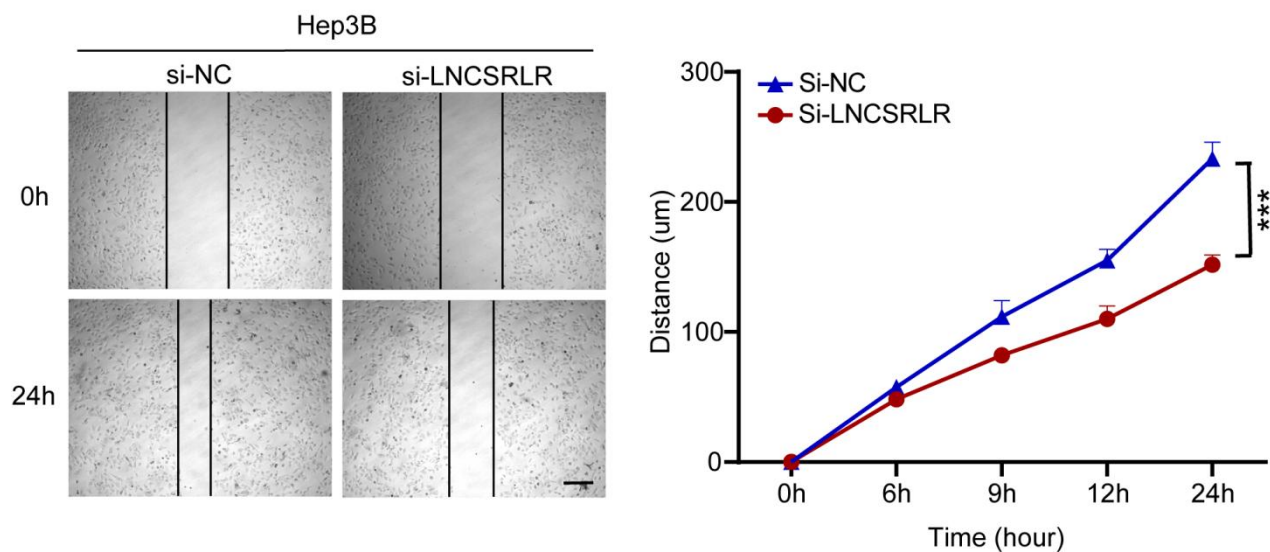

**Supplementary Figure 8.** Migration was determined by scratch experiments.

## 2.2 SUPPLEMENTARY TABLES

**Supplementary Figure 1.** ferroptosis-associated genes obtained from the FerrDb website.

| Symbol | Name                                  |
|--------|---------------------------------------|
| PTGS2  | Prostaglandin-endoperoxide synthase 2 |
| DUSP1  | Dual specificity phosphatase 1        |
| NOS2   | Nitric oxide synthase 2               |
| NCF2   | Neutrophil cytosolic factor 2         |
| MT3    | Metallothionein 3                     |
| UBC    | Ubiquitin C                           |
| ALB    | Albumin                               |
| TXNRD1 | Thioredoxin reductase 1               |

|           |                                                            |
|-----------|------------------------------------------------------------|
| SRXN1     | Sulfiredoxin 1                                             |
| GPX2      | Glutathione peroxidase 2                                   |
| BNIP3     | BCL2 interacting protein 3                                 |
| OXSRI     | Oxidative stress responsive kinase 1                       |
| SELENOS   | Selenoprotein S                                            |
| ANGPTL7   | Angiopoietin like 7                                        |
| CHAC1     | ChaC glutathione specific gamma-glutamylcyclotransferase 1 |
| SLC7A11   | Solute carrier family 7 member 11                          |
| DDIT4     | DNA damage inducible transcript 4                          |
| LOC284561 | _NA_                                                       |
| ASNS      | Asparagine synthetase (glutamine-hydrolyzing)              |
| TSC22D3   | TSC22 domain family member 3                               |
| DDIT3     | DNA damage inducible transcript 3                          |
| JDP2      | Jun dimerization protein 2                                 |
| SESN2     | Sestrin 2                                                  |
| SLC1A4    | Solute carrier family 1 member 4                           |
| PCK2      | Phosphoenolpyruvate carboxykinase 2, mitochondrial         |
| TXNIP     | Thioredoxin interacting protein                            |
| VLDLR     | Very low density lipoprotein receptor                      |
| GPT2      | Glutamic--pyruvic transaminase 2                           |

|          |                                                                   |
|----------|-------------------------------------------------------------------|
| PSAT1    | Phosphoserine aminotransferase 1                                  |
| LURAP1L  | Leucine rich adaptor protein 1 like                               |
| SLC7A5   | Solute carrier family 7 member 5                                  |
| HERPUD1  | Homocysteine inducible ER protein with ubiquitin like domain<br>1 |
| XBP1     | X-box binding protein 1                                           |
| ATF3     | Activating transcription factor 3                                 |
| SLC3A2   | Solute carrier family 3 member 2                                  |
| CBS      | Cystathionine beta-synthase                                       |
| ATF4     | Activating transcription factor 4                                 |
| ZNF419   | Zinc finger protein 419                                           |
| KLHL24   | Kelch like family member 24                                       |
| TRIB3    | Tribbles pseudokinase 3                                           |
| ZFP69B   | ZFP69 zinc finger protein B                                       |
| ATP6V1G2 | ATPase H <sup>+</sup> transporting V1 subunit G2                  |
| VEGFA    | Vascular endothelial growth factor A                              |
| GDF15    | Growth differentiation factor 15                                  |
| TUBE1    | Tubulin epsilon 1                                                 |
| ARRDC3   | Arrestin domain containing 3                                      |
| CEBPG    | CCAAT enhancer binding protein gamma                              |
| SNORA16A | Small nucleolar RNA, H/ACA box 16A                                |

|                    |                                                            |
|--------------------|------------------------------------------------------------|
| RGS4               | Regulator of G protein signaling 4                         |
| BLOC1S5-<br>TXNDC5 | BLOC1S5-TXNDC5 readthrough (NMD candidate)                 |
| LOC390705          | _NA_                                                       |
| EIF2S1             | Eukaryotic translation initiation factor 2 subunit 1       |
| KIM-1              | Kidney injury molecule-1                                   |
| IL6                | Interleukin 6                                              |
| CXCL2              | C-X-C motif chemokine ligand 2                             |
| RELA               | RELA proto-oncogene, NF-kB subunit                         |
| HSD17B11           | Hydroxysteroid 17-beta dehydrogenase 11                    |
| AGPAT3             | 1-acylglycerol-3-phosphate O-acyltransferase 3             |
| SETD1B             | SET domain containing 1B, histone lysine methyltransferase |
| HMOX1              | Heme oxygenase 1                                           |
| TF                 | Transferrin                                                |
| FTL                | Ferritin light chain                                       |
| RPL8               | Ribosomal protein L8                                       |
| ATP5MC3            | ATP synthase membrane subunit c locus 3                    |
| TFRC               | Transferrin receptor                                       |
| MAFG               | MAF bZIP transcription factor G                            |
| IL33               | Interleukin 33                                             |
| FTH1               | Ferritin heavy chain 1                                     |

|         |                                                  |
|---------|--------------------------------------------------|
| SLC40A1 | Solute carrier family 40 member 1                |
| TF      | Transferrin                                      |
| TFRC    | Transferrin receptor                             |
| FTH1    | Ferritin heavy chain 1                           |
| GPX4    | Glutathione peroxidase 4                         |
| HAMP    | Hepcidin antimicrobial peptide                   |
| HSPB1   | Heat shock protein family B (small) member 1     |
| NFE2L2  | Nuclear factor, erythroid 2 like 2               |
| STEAP3  | STEAP3 metalloredutase                           |
| DRD5    | Dopamine receptor D5                             |
| GPX4    | Glutathione peroxidase 4                         |
| DRD4    | Dopamine receptor D4                             |
| MAP3K5  | Mitogen-activated protein kinase kinase kinase 5 |
| MAPK14  | Mitogen-activated protein kinase 14              |
| SLC2A1  | Solute carrier family 2 member 1                 |
| SLC2A3  | Solute carrier family 2 member 3                 |
| SLC2A6  | Solute carrier family 2 member 6                 |
| SLC2A8  | Solute carrier family 2 member 8                 |
| SLC2A12 | Solute carrier family 2 member 12                |
| GLUT13  | _NA_                                             |
| SLC2A14 | Solute carrier family 2 member 14                |



|         |                                                           |
|---------|-----------------------------------------------------------|
| EIF2AK4 | Eukaryotic translation initiation factor 2 alpha kinase 4 |
| EIF2S1  | Eukaryotic translation initiation factor 2 subunit alpha  |
| ATF4    | Activating transcription factor 4                         |
| ALOX5   | Arachidonate 5-lipoxygenase                               |
| ALOX12  | Arachidonate 12-lipoxygenase, 12S type                    |
| ALOX15  | Arachidonate 15-lipoxygenase                              |
| ALOX5   | Arachidonate 5-lipoxygenase                               |
| ACSF2   | Acyl-CoA synthetase family member 2                       |
| IREB2   | Iron responsive element binding protein 2                 |
| GPX4    | Glutathione peroxidase 4                                  |
| HMGB1   | High mobility group box 1                                 |
| HMOX1   | Heme oxygenase 1                                          |
| NFE2L2  | Nuclear factor, erythroid 2 like 2                        |
| ELAVL1  | ELAV like RNA binding protein 1                           |
| SLC3A2  | Solute carrier family 3 member 2                          |
| SLC7A11 | Solute carrier family 7 member 11                         |
| TFAP2C  | Transcription factor AP-2 gamma                           |
| SP1     | Sp1 transcription factor                                  |
| HBA1    | Hemoglobin subunit alpha 1                                |
| NNMT    | Nicotinamide N-methyltransferase                          |

|         |                                                                                |
|---------|--------------------------------------------------------------------------------|
| PLIN4   | Perilipin 4                                                                    |
| HIC1    | HIC ZBTB transcriptional repressor 1                                           |
| STMN1   | Stathmin 1                                                                     |
| RRM2    | Ribonucleotide reductase regulatory subunit M2                                 |
| CAPG    | Capping actin protein, gelsolin like                                           |
| HNF4A   | Hepatocyte nuclear factor 4 alpha                                              |
| NG2     | Neuroglobin                                                                    |
| YWHAE   | Tyrosine 3-monooxygenase/tryptophan 5-monooxygenase activation protein epsilon |
| GABPB1  | GA binding protein transcription factor subunit beta 1                         |
| AURKA   | Aurora kinase A                                                                |
| MIR4715 | microRNA 4715                                                                  |
| RIPK1   | Receptor interacting serine/threonine kinase 1                                 |
| PRDX1   | Peroxiredoxin 1                                                                |
| MIR30B  | microRNA 30b                                                                   |

**Supplementary Figure 2.** Primer sequences of four ferroptosis-related lncRNAs for quantitative real-time PCR.

| lncRNA  | Forward primer             | Backward primer              |
|---------|----------------------------|------------------------------|
| LNCSSLR | 5'-CACTGTTCCAGGCACCAAGG-3' | 5'-TGTCGCCAAAGAAGAGAACAGG-3' |
